# Supplementary material for: In Vitro Rescue of the Bile Acid Transport Function of ABCB11 Variants by CFTR Potentiators
Source: MDPI journal article supplement (doi:10.3390/ijms231810758), 2022-09-15
Supplement: s1 [file s1]

## **SUPPLEMENTARY INFORMATION**

### ***In vitro* Rescue of the Bile Acid Transport Function of ABCB11 Variants by CFTR Potentiators**

Elodie Mareux<sup>1</sup>, Martine Lapalus<sup>1</sup>, Amel Ben Saad<sup>1</sup>, Renaud Zelli<sup>2</sup>, Mounia Lakli<sup>1</sup>, Yosra Riahi<sup>1</sup>, Marion Almes<sup>3</sup>, Manon Banet<sup>1</sup>, Isabelle Callebaut<sup>4</sup>, Jean-Luc Decout<sup>2</sup>, Thomas Falguières<sup>1,†</sup>, Emmanuel Jacquemin<sup>1,3,†</sup>, Emmanuel Gonzales<sup>1,3,\*,†</sup>

<sup>1</sup> Inserm UMR\_S1193, Physiopathogénèse et traitement des maladies du foie, Université Paris-Saclay, FHU Hepatinov, 91400 Orsay, France.

<sup>2</sup> Université Grenoble Alpes, CNRS, UMR CNRS 5063, DPM, 38000 Grenoble, France.

<sup>†</sup> These authors share last co-authorship.

<sup>3</sup> Assistance Publique - Hôpitaux de Paris, Pediatric Hepatology & Pediatric Liver Transplant Department, Reference Center for Rare Pediatric Liver Diseases, FILFOIE, ERN Rare-Liver, Faculté de Médecine Paris-Saclay, CHU Bicêtre, 94270 Le Kremlin-Bicêtre, France.

<sup>4</sup> Muséum National d'Histoire Naturelle, UMR CNRS 7590, Institut de Minéralogie, de Physique des Matériaux et de Cosmochimie (IMPMC), Sorbonne Université, 75005 Paris, France.

**\* Corresponding author:** Pr Emmanuel Gonzales, M.D., PhD., Service d'Hépatologie et de transplantation hépatique pédiatriques, Hôpital Bicêtre, 78 rue du Général Leclerc, 94275 Le Kremlin-Bicêtre cedex, France. Tel: 33-1-45-21-37-88. E-mail: [emmanuel.gonzales@aphp.fr](mailto:emmanuel.gonzales@aphp.fr)

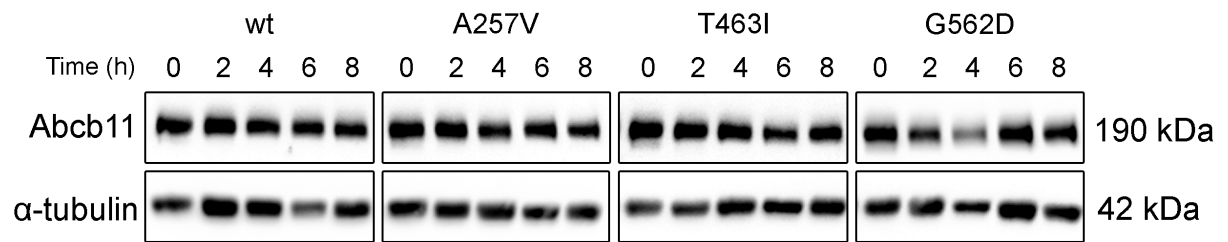

**Figure S1:** Stability of the Abcb11 variants. MDCK cells stably expressing Abcb11-GFP (wt or variants) were treated with cycloheximide (25  $\mu$ g/mL) to inhibit protein synthesis. Then, expression of Abcb11 (wt and variants) and  $\alpha$ -tubulin was analysed by immunoblot using anti-GFP and anti-tubulin antibodies at the indicated time points.

**Table S1:** Chemical structures of CFTR potentiators tested in this study.

| Compound            | IUPAC Name                                                                               | Chemical structure                                                                  | PubChem CID | MW (Da) | References |
|---------------------|------------------------------------------------------------------------------------------|-------------------------------------------------------------------------------------|-------------|---------|------------|
| Ivacaftor (VX-770)  | N-(2,4-ditert-butyl-5-hydroxyphenyl)-4-oxo-1H-quinoline-3-carboxamide                    | 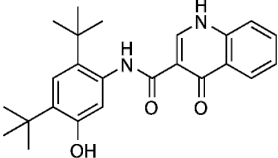   | 16220172    | 392.49  | [1]        |
| GLPG1837 (ABBV-974) | N-(3-carbamoyl-5,5,7,7-tetramethyl-4H-thieno[2,3-c]pyran-2-yl)-1H-pyrazole-5-carboxamide |    | 117857370   | 348.42  | [2]        |
| SBC040              | 4-(6-Amino-2-chloro-9H-purin-9-yl)benzamide                                              |   | —           | 403.7   | [3]        |
| SBC219              | 4-(6-Amino-2-((3-phenylpropyl)amino)-9H-purin-9-yl)benzamide                             |  | —           | 387.4   | [3]        |

### Supplementary References

1. Van Goor, F.; Hadida, S.; Grootenhuis, P. D.; Burton, B.; Cao, D.; Neuberger, T.; Turnbull, A.; Singh, A.; Joubran, J.; Hazlewood, A., et al. Rescue of CF airway epithelial cell function in vitro by a CFTR potentiator, VX-770. *Proc Natl Acad Sci U S A* **2009**, 106, 18825-30.
2. Yeh, H. I.; Sohma, Y.; Conrath, K.; Hwang, T. C. A common mechanism for CFTR potentiators. *J Gen Physiol* **2017**, 149, 1105-1118.
3. Froux, L.; Elbahnsi, A.; Boucherle, B.; Billet, A.; Baatallah, N.; Hoffmann, B.; Alliot, J.; Zelli, R.; Zeinyeh, W.; Haudecoeur, R., et al. Targeting different binding sites in the CFTR structures allows to synergistically potentiate channel activity. *Eur J Med Chem* **2020**, 190, 112116.
